# Supplementary material
Source: PubMed Central journal article supplement (PMC3190939)

## Supplemental Figure Legends

Supplemental Figure 1. **KLHL7 deletion mutants do not form punctate structures in the cell.** HeLa cells cultured on coverslips were transfected with FLAG-KLHL7 wild-type or deletion mutants. The cells were fixed and stained with anti-FLAG antibody and Hoechst33342. Scale bars, 20  $\mu$ M.

Supplemental Figure 2. **KLHL7 co-localization with GFP-LC3 does not increase with proteasome or lysosome inhibition.** ATG5+/+:GFP-LC3 and ATG5-/-:GFP-LC3 MEFs expressing FLAG-KLHL7 were subjected to proteasome inhibition with MG132 or lysosome inhibition with NH<sub>4</sub>Cl and stained with anti-FLAG and anti-GFP antibodies. The nucleus was stained with Hoechst 33342. Scale bars, 20  $\mu$ M.

Supplemental Figure 3. **Alignment of KLHL7.** *A*, Alignment of several vertebrate KLHL7 BTB-BACK domains. Homo, Homo sapiens; Pan, Pan troglodytes; Canis, canis lupus familiaris; Bos, Bos taurus; Mus, Mus musculus; Rattus, Rattus norvegicus; Gallus, Gallus gallus. The numbers denote the amino acid position. *B*, Multiple sequence alignment of the '3-box' region of human BTB proteins. The S150 and A153 are highlighted with blue and red boxes.

Supplemental Figure 4. **KLHL7 S150N co-localizes with Cul3, but A153T does not.** *A*. HeLa cells on coverslips transfected with FLAG-KLHL7 S150N or A153V with GFP-Cul3, were fixed and stained with anti-FLAG and anti-GFP antibodies. The nucleus was stained with Hoechst 33342. Scale bars, 20  $\mu$ M.

Supplemental Figure 5. **KLHL7 S150N and A153T hetero dimerize with Cul3, and A153T associate with Cul3 through the hetero dimer.** *A*. HCT116 cells were transfected with FLAG-KLHL7 S150N or A153T with Myc-KLHL7 wild-type and the cell lysates were immunoprecipitated with anti-FLAG antibody. The immunoprecipitates were immunoblotted with anti-Myc and anti-FLAG antibodies. *B*. HCT116 cells were transfected with FLAG-KLHL7 A153T and Myc-KLHL7, as indicated. The cell lysates were immunoprecipitated with anti-FLAG antibody and immunoblotted with anti-Cul3, anti-Myc and anti-FLAG antibodies.

Supplemental Figure 1

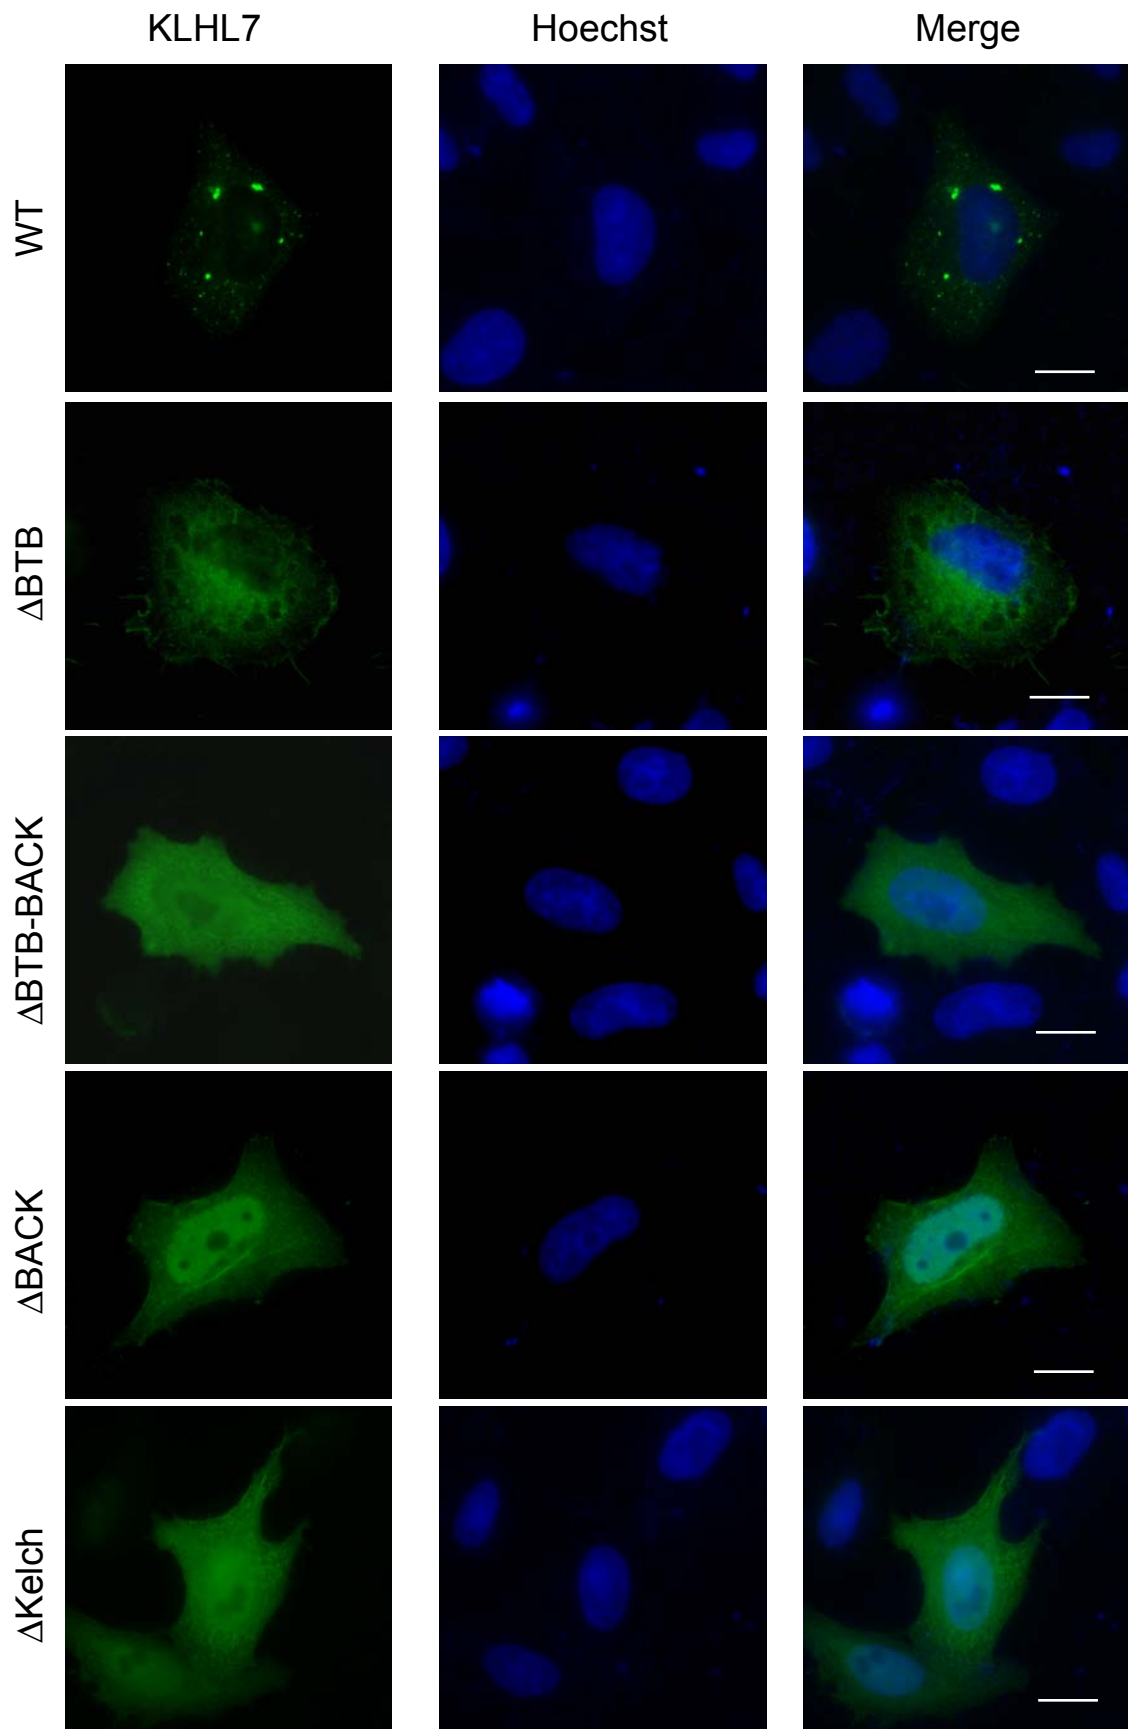

ATG5<sup>+/+</sup>: GFP-LC3

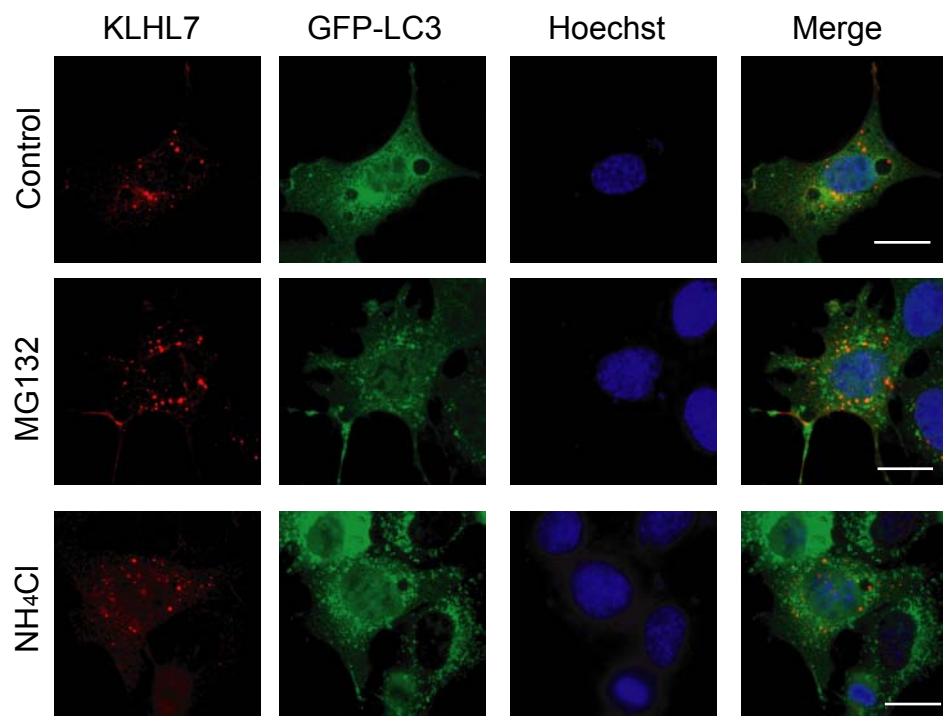

ATG5<sup>-/-</sup>: GFP-LC3

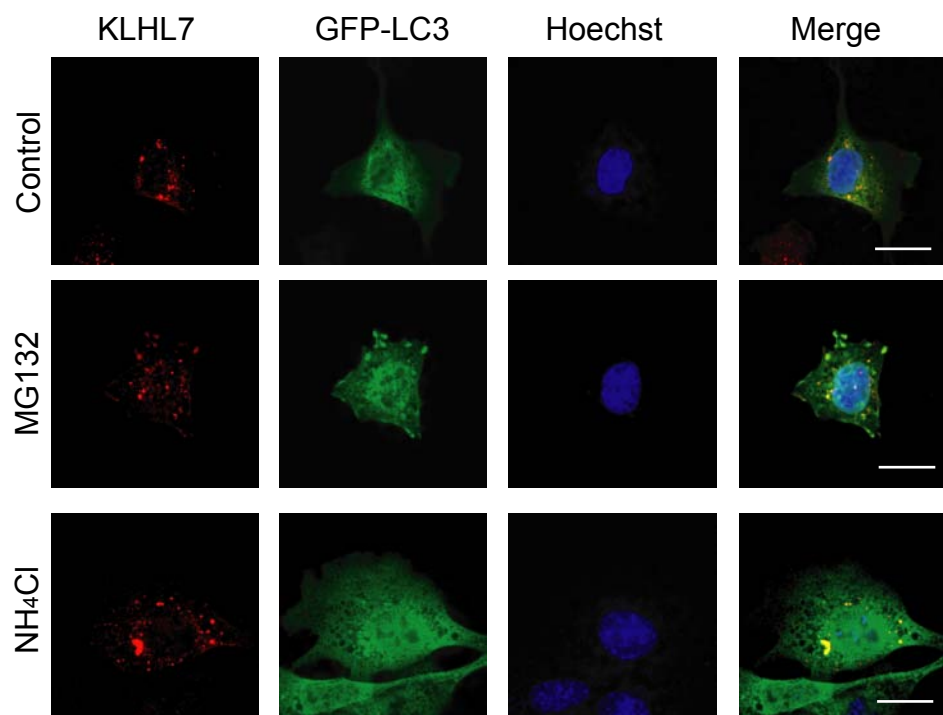

Supplemental Figure 3

A

```

Homo 34 MNNMRKQKTLCDVILMVQERKI PAHRVVAAAASHFFNLMFTTNMLESKSF EVELKDAEPDIEQLVEFAYTARISVNSNNVQSLDDAANQYQIEPVKKMCVDFLKEQ 140
Pan 34 MNNMRKQKTLCDVILMVQERKI PAHRVVAAAASHFFNLMFTTNMLESKSF EVELKDAEPDIEQLVEFAYTARISVNSNNVQSLDDAANQYQIEPVKKMCVDFLKEQ 140
Canis -----MVQERKI PAHRVVAAAASHFFNLMFTTNMLESKSF EVELKDAEPDIEQLVEFAYTARISVNSNNVQSLDDAANQYQIEPVKKMCVDFLKEQ 92
Bos 34 MNNMRKQKTLCDVILMVQERKI PAHRVVAAAASHFFNLMFTTNMLESKSF EVELKDAEPDIEQLVEFAYTARISVNSNNVQSLDDAANQYQIEPVKKMCVDFLKEQ 140
Mus 34 MNNMRKQKTLCDVILTVQERKI PAHRVVAAAASHFFNLMFTTNMLESKSF EVELKDAEPDIEQLVEFAYTARISVNSNNVQSLDDAANQYQIEPVKKMCVDFLKEQ 140
Rattus 34 MNNMRKQKTLCDVILMVQERKI PAHRVVAAAASHFFNLMFTTNMLESKSF EVELKDAEPDIEQLVEFAYTARISVNSNNVQSLDDAANQYQIEPVKKMCVDFLKEQ 140
Gallus 34 MNSMRKQKTLCDVILMVQERRI PAHRVVLASASHFFNLMFTTNMLESKSF EVELKDAEPDIEQLVEFAYTARISVNSNNVQSLDDAANQYQIEPVKKMCVDFLKEQ 140
          ****.*****.*****
Homo VDASNCLGISVLA ECLDCPELKATADDFIHQHFTEVYK TDEFLQLDVKRVTHLLNQDTLTVRAEDQVYDAAVRWLKYDEPNRQPFMVDILAKVRFPLISKNFLSKT 246
Pan VDASNCLGISVLA ECLDCPELKATADDFIHQHFTEVYK TDEFLQLDVKRVTHLLNQDTLTVRAEDQVYDAAVRWLKYDEPNRQPFMVDILAKVRFPLISKNFLSKT 246
Canis VDASNCLGISVLA ECLDCPELKATADDFIHQHFTEVYK TDEFLQLDVKRVTHLLNQDTLTVRAEDQVYDAAVRWLKYDEPNRQPFMVDILAKVRFPLISKNFLSKT 198
Bos VDASNCLGISVLA ECLDCPELKATADDFIHQHFTEVYK TDEFLQLDVKRVTHLLNQDTLTVRAEDQVYDAAVRWLKYDEPNRQPFMVDILAKVRFPLISKNFLSKT 246
Mus VDASNCLGISVLA ECLDCPELKATADDFIHQHFTEVYK TDEFLQLDVKRVTHLLSQDTLTVRAEDQVYDAAVRWLKYDEPNRQPFMVDILAKVRFPLISKNFLSKT 246
Rattus VDASNCLGISVLA ECLDCPELKSTADDFIHQHFTEVYK TDEFLQLDVKRVTHLLSQDTLTVRAEDQVYDAAVRWLKYDEPNRQPFMVDILAKVRFPLISKNFLSKT 246
Gallus VDASNCLGISVLA ECLDCPELKATADDFIHQHFTEVYK TDEFLQLDVKRVTHLLNQDTLTVRAEDQVYDAAVRWLKYDEPNRQPFMVDILAKVRFPLISKNFLSKT 246
          *****.*****.*****.*****
    
```

B

```

KLHL7 AANQYQIEPVKKMCVDFLKEQVDASNCLGISVLA ECLDCPELKATADDFIHQHFTEVYK T 179
KLHL11 LADRFLILRLKEFCGEFLK KKLHLSNCVAIHSLAHMYTLSQLALKAADMIRRNFKKVIQD 238
KLHL9 AASFLQILPVLDFCKVFLISGVSLDNCVEVGRIANTYNLIEVDKYVNNFILKNFPALLST 187
KEAP1 GAVMYQIDSVVRACSDFLVQQLDPSNAIGIANFAEQIGCVELHQRAREYIYMHFGEVAKQ 217
gigaxonin AADLLLLTDLKTLCCFLEGCIAAENCIGIRDFALHYCLHHVHYLATEYLETHFRDVSST 167
          * : : * ** : .*.: : :* : . : . : : * : .
    
```

Supplemental Figure 4

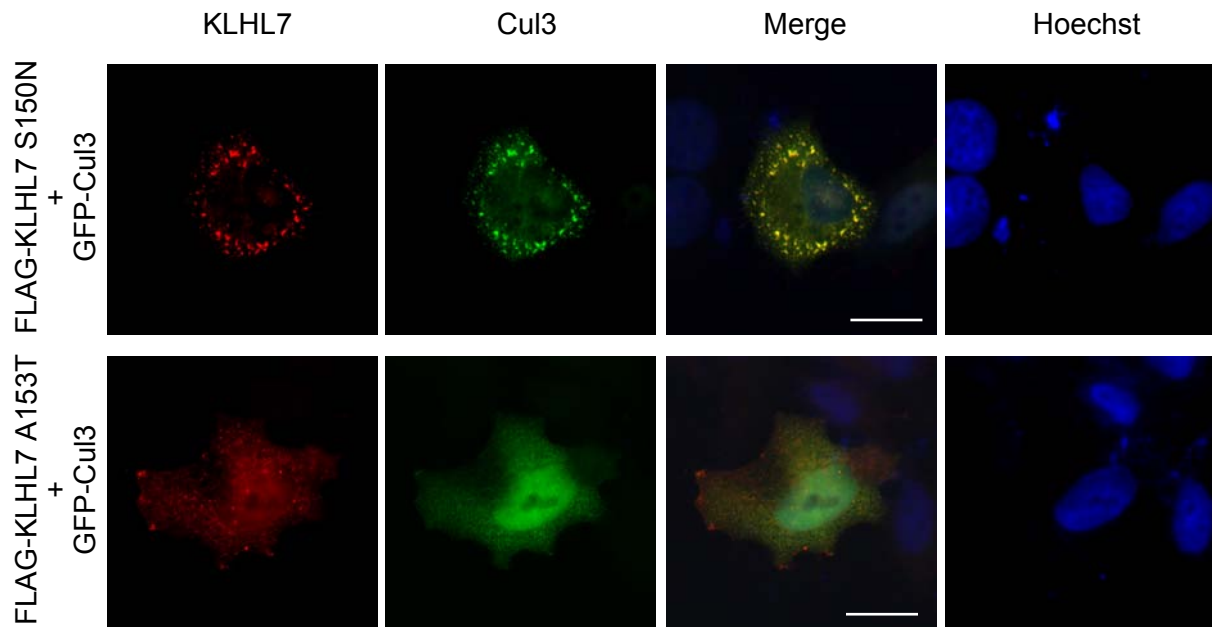

Supplemental Figure 5

A

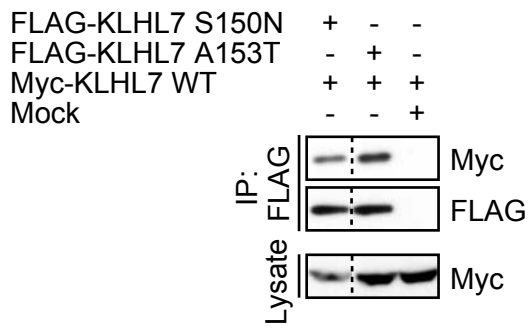

B

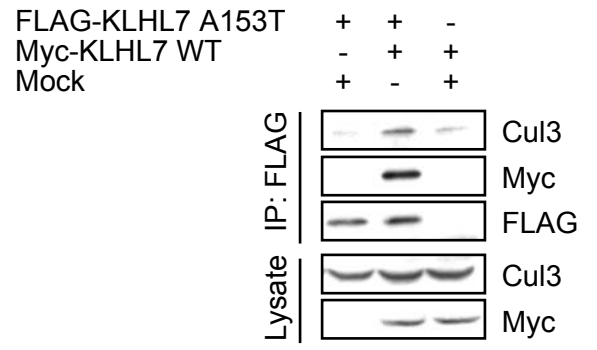

Supplement: supp_M111.245126_jbc.M111.245126-1.pdf [file supp_M111.245126_jbc.M111.245126-1.pdf]
